# Supplementary material for: Factors affecting forest area change in Southeast Asia during 1980-2010
Source: PubMed Central journal article supplement (PMC5953454; doi:10.1371/journal.pone.0197391), 2018-05-15

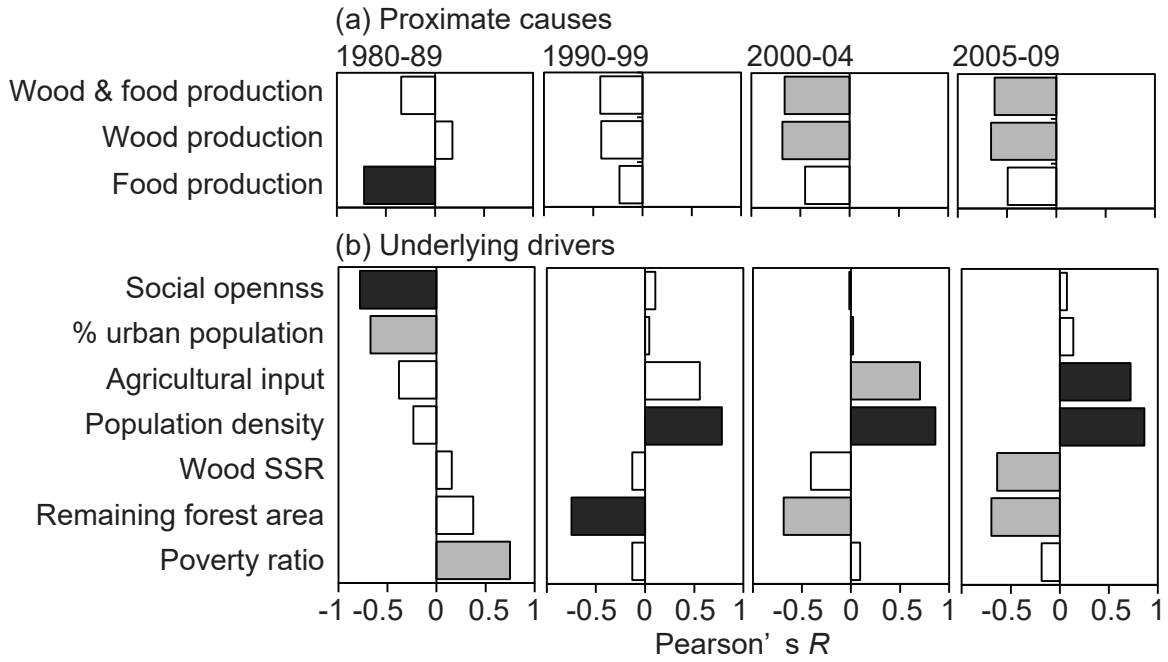

Supplement: pone.0197391.s007.pdf [file pone.0197391.s007.pdf]
