# Supplementary material for: Factors affecting forest area change in Southeast Asia during 1980-2010
Source: PubMed Central journal article supplement (PMC5953454; doi:10.1371/journal.pone.0197391), 2018-05-15
Supplement: pone.0197391.s009.pdf [file pone.0197391.s009.pdf]

|                                            | PCA1         | PCA2         | PCA3         |
|--------------------------------------------|--------------|--------------|--------------|
| Climate variables                          |              |              |              |
| Standard deviation                         | 3.30         | 2.54         |              |
| Proportion of variance                     | 0.57         | 0.34         |              |
| Cumulative proportion                      | 0.57         | 0.91         |              |
| Factor loadings                            |              |              |              |
| Isothermality (BIO03)                      | <b>0.98</b>  | 0.11         |              |
| Precipitation seasonality (BIO15)          | <b>-0.98</b> | -0.12        |              |
| Temperature annual range (BIO07)           | <b>-0.98</b> | -0.02        |              |
| Precipitation coldest quarter (BIO19)      | <b>0.96</b>  | 0.22         |              |
| Temperature seasonality (BIO04)            | <b>-0.96</b> | 0.17         |              |
| Precipitation driest quarter (BIO17)       | <b>0.94</b>  | 0.28         |              |
| Precipitation driest month (BIO14)         | <b>0.94</b>  | 0.29         |              |
| Minimum temperature coldest month (BIO06)  | <b>0.93</b>  | -0.32        |              |
| Annual precipitation (BIO12)               | <b>0.85</b>  | 0.48         |              |
| Mean temperature driest quarter (BIO09)    | <b>0.84</b>  | -0.50        |              |
| Mean temperature coldest quarter (BIO11)   | <b>0.83</b>  | -0.52        |              |
| Diurnal temperature range (BIO02)          | <b>-0.75</b> | -0.06        |              |
| Mean temperature wettest quarter (BIO08)   | -0.15        | <b>-0.98</b> |              |
| Precipitation warmest quarter (BIO18)      | 0.05         | <b>0.98</b>  |              |
| Mean temperature warmest quarter (BIO10)   | -0.23        | <b>-0.95</b> |              |
| Maximum temperature warmest month (BIO05)  | -0.50        | <b>-0.81</b> |              |
| Mean annual temperature (BIO01)            | 0.56         | <b>-0.80</b> |              |
| Precipitation wettest quarter (BIO16)      | -0.29        | <b>0.78</b>  |              |
| Precipitation wettest month (BIO13)        | -0.36        | <b>0.76</b>  |              |
| Soil variables                             |              |              |              |
| Standard deviation                         | 2.29         | 1.86         | 1.49         |
| Proportion of variance                     | 0.44         | 0.29         | 0.18         |
| Cumulative proportion                      | 0.44         | 0.72         | 0.91         |
| Factor loadings                            |              |              |              |
| Easily available water                     | <b>-0.94</b> | 0.15         | 0.11         |
| Soil moisture storage capacity (mm/m)      | <b>-0.94</b> | 0.15         | 0.11         |
| Cation exchange capacity (soil) -Topsoil   | <b>0.92</b>  | -0.02        | -0.08        |
| Effective soil depth (cm)                  | <b>0.90</b>  | 0.09         | 0.24         |
| Cation exchange capacity (clay) -Topsoil   | <b>0.83</b>  | -0.37        | -0.19        |
| Nitrogen % - Topsoil                       | <b>0.69</b>  | -0.62        | 0.25         |
| Organic carbon pool (kg/m <sup>2</sup> /m) | -0.43        | <b>-0.88</b> | -0.02        |
| C/N ratio class - Topsoil                  | -0.30        | <b>-0.79</b> | -0.49        |
| pH - Topsoil                               | 0.36         | <b>0.78</b>  | -0.42        |
| Base saturation % - Topsoil                | 0.28         | <b>0.70</b>  | 0.57         |
| Soil drainage class                        | 0.32         | 0.05         | <b>-0.92</b> |
| Organic carbon % -Topsoil                  | 0.26         | -0.61        | <b>0.66</b>  |
