# Supplementary material for: Factors affecting forest area change in Southeast Asia during 1980-2010
Source: PubMed Central journal article supplement (PMC5953454; doi:10.1371/journal.pone.0197391), 2018-05-15
Supplement: pone.0197391.s010.pdf [file pone.0197391.s010.pdf]

|                                   | % forest area |              | Forest-area change |              |             |              |             |             |             |             |
|-----------------------------------|---------------|--------------|--------------------|--------------|-------------|--------------|-------------|-------------|-------------|-------------|
|                                   | in 1990       |              | 1980-89            |              | 1990-99     |              | 2000-04     |             | 2005-09     |             |
|                                   | <i>P</i>      | <i>R</i>     | <i>P</i>           | <i>R</i>     | <i>P</i>    | <i>R</i>     | <i>P</i>    | <i>R</i>    | <i>P</i>    | <i>R</i>    |
| <i>Proximate causes</i>           |               |              |                    |              |             |              |             |             |             |             |
| 1. Wood & food production         | 0.24          | 0.47         | 0.40               | -0.35        | 0.29        | -0.43        | 0.07        | -0.66       | 0.09        | -0.63       |
| 2. Wood production                | <b>0.02</b>   | <b>0.78</b>  | 0.68               | 0.18         | 0.30        | -0.42        | 0.06        | -0.68       | 0.07        | -0.66       |
| 3. Food production                | 0.97          | -0.02        | <b>0.04</b>        | <b>-0.72</b> | 0.58        | -0.23        | 0.26        | -0.45       | 0.21        | -0.49       |
| 4. Oil palm production            | 0.51          | 0.28         | 0.69               | -0.17        | 0.89        | -0.06        | 0.63        | -0.20       | 0.78        | -0.12       |
| 5. Stimulants production          | 0.44          | 0.32         | 0.74               | -0.14        | 0.79        | -0.11        | 0.47        | 0.30        | 0.85        | 0.08        |
| 6. Major crops production         | 0.57          | -0.24        | 0.27               | -0.45        | 0.74        | -0.14        | 0.59        | -0.23       | 0.40        | -0.35       |
| <i>Underlying causes</i>          |               |              |                    |              |             |              |             |             |             |             |
| 1. Population density             | <b>0.00</b>   | <b>-0.93</b> | 0.57               | -0.24        | <b>0.02</b> | <b>0.78</b>  | <b>0.01</b> | <b>0.86</b> | <b>0.01</b> | <b>0.86</b> |
| 2. Total population growth        | 0.44          | 0.32         | 0.91               | -0.05        | 0.84        | -0.09        | 0.65        | -0.19       | 0.76        | -0.13       |
| 3. Rural population growth        | 0.32          | 0.40         | 0.17               | 0.54         | 0.62        | 0.21         | 0.86        | 0.08        | 0.87        | 0.07        |
| 4. Urban population growth        | 0.31          | 0.42         | 0.92               | 0.04         | 0.48        | -0.29        | 0.90        | -0.05       | 0.78        | -0.12       |
| 5. Percentage of urban population | 0.37          | -0.37        | 0.07               | -0.67        | 0.92        | 0.04         | 0.96        | 0.02        | 0.75        | 0.14        |
| 6. Per capita GDP                 | 0.97          | -0.02        | 0.19               | -0.52        | 0.97        | -0.02        | 0.84        | -0.08       | 0.84        | 0.09        |
| 7. GDP growth                     | 0.83          | 0.09         | 0.68               | 0.17         | 0.30        | 0.42         | 0.64        | -0.20       | 0.41        | -0.34       |
| 8. Industry                       | 0.53          | -0.29        | 0.40               | -0.38        | 0.76        | 0.13         | 0.46        | 0.31        | 0.74        | 0.15        |
| 9. Headcount poverty ratio        | 0.67          | 0.20         | 0.05               | 0.75         | 0.78        | -0.13        | 0.84        | 0.09        | 0.69        | -0.19       |
| 10. Forest rents                  | 0.31          | 0.51         | 0.27               | 0.54         | 0.68        | -0.19        | 0.37        | -0.41       | 0.23        | -0.52       |
| 11. Total natural resources rents | 0.11          | 0.71         | 0.38               | 0.44         | 0.65        | -0.21        | 0.85        | 0.09        | 0.92        | 0.05        |
| 12. Proportion of forest rents    | 0.96          | 0.03         | 0.42               | 0.41         | 0.89        | -0.07        | 0.28        | -0.47       | 0.13        | -0.63       |
| 13. Human development index       | 0.25          | -0.46        | 0.14               | -0.57        | 0.52        | 0.27         | 0.38        | 0.36        | 0.24        | 0.47        |
| 14. Governance                    | 0.71          | 0.20         | 0.74               | -0.17        | 0.43        | 0.40         | 0.79        | -0.14       | 0.64        | 0.20        |
| 15. Social openness               | 0.39          | -0.35        | <b>0.02</b>        | <b>-0.78</b> | 0.80        | 0.11         | 0.97        | -0.02       | 0.86        | 0.07        |
| 16. Agricultural input            | 0.78          | -0.12        | 0.35               | -0.38        | 0.15        | 0.56         | 0.05        | 0.70        | <b>0.04</b> | <b>0.72</b> |
| 17. Cereal yield                  | 0.91          | 0.05         | 0.31               | 0.41         | 0.82        | 0.10         | 0.10        | 0.62        | 0.40        | 0.35        |
| 18. Agricultural yield            | 0.95          | -0.03        | 0.68               | -0.18        | 0.91        | 0.05         | 0.63        | 0.20        | 0.95        | 0.03        |
| 19. Wood SSR                      | 0.32          | 0.41         | 0.72               | 0.15         | 0.76        | -0.13        | 0.31        | -0.41       | 0.09        | -0.64       |
| 20. Food SSR                      | 0.85          | -0.08        | 0.25               | -0.46        | 0.82        | -0.09        | 0.78        | -0.12       | 0.34        | -0.39       |
| 21. Wood and food SSR             | 0.78          | -0.12        | 0.24               | -0.47        | 0.76        | -0.13        | 0.50        | -0.28       | 0.19        | -0.52       |
| 22. Remaining forest area         |               |              | 0.36               | 0.37         | <b>0.03</b> | <b>-0.75</b> | 0.06        | -0.69       | 0.05        | -0.70       |
| 23. Median elevation              | 0.64          | 0.20         | 0.60               | 0.22         | 0.83        | 0.09         | 0.93        | 0.04        | 0.99        | 0.00        |
| 24. Total land area               | 0.71          | 0.16         | 0.38               | 0.36         | 0.20        | -0.51        | 0.84        | -0.09       | 0.55        | -0.25       |
| 25. Climatic seasonality          | 0.96          | 0.02         | 0.61               | -0.22        | 0.72        | -0.15        | 0.91        | -0.05       | 0.97        | 0.02        |
| 26. Soil moisture, CEC            | 0.59          | -0.23        | 0.57               | -0.24        | 0.67        | -0.18        | 0.99        | 0.00        | 0.94        | 0.03        |
| 27. Lowland tropical forests      | <b>0.05</b>   | <b>-0.71</b> | 0.17               | -0.54        | 0.12        | 0.59         | 0.32        | 0.41        | 0.18        | 0.53        |
