# Supplementary material for: Factors affecting forest area change in Southeast Asia during 1980-2010
Source: PubMed Central journal article supplement (PMC5953454; doi:10.1371/journal.pone.0197391), 2018-05-15
Supplement: pone.0197391.s011.pdf [file pone.0197391.s011.pdf]

| Model rank | Estimate  |       |        |                  |        |        |        |       |      | df     | logLik | AICc   | $\Delta$ | AICc  | weight |
|------------|-----------|-------|--------|------------------|--------|--------|--------|-------|------|--------|--------|--------|----------|-------|--------|
|            | Intercept | AGI   | FP     | SOP <sup>2</sup> | SOP    | URB    | WSSR   | POP   | WP   |        |        |        |          |       |        |
| 1 / 256    | 0.414     | 0.455 | -0.008 | 0.395            | -0.357 |        |        |       |      |        | 6      | -27.92 | 71.19    | 0     | 0.31   |
| 2 / 256    | 0.954     | 0.494 | -0.008 | 0.373            | -0.256 | -0.015 |        |       |      |        | 7      | -26.96 | 72.58    | 1.39  | 0.15   |
| 3 / 256    | 1.717     | 0.492 | -0.009 | 0.275            |        | -0.029 |        |       |      |        | 6      | -29.12 | 73.61    | 2.41  | 0.09   |
| 4 / 256    | 0.136     | 0.424 | -0.007 | 0.373            | -0.363 |        |        | 0.001 |      |        | 7      | -27.65 | 73.97    | 2.78  | 0.08   |
| 5 / 256    | 0.849     | 0.459 | -0.008 | 0.371            | -0.354 |        | -0.410 |       |      |        | 7      | -27.75 | 74.16    | 2.97  | 0.07   |
| 6 / 256    | 0.450     | 0.451 | -0.008 | 0.387            | -0.359 |        |        |       |      | -0.001 | 7      | -27.87 | 74.41    | 3.22  | 0.06   |
| 227 / 256  | -0.508    |       |        |                  |        |        |        |       |      |        | 2      | -49.62 | 103.66   | 32.46 | 0.00   |
| IOV        |           | 1.00  | 1.00   | 0.99             | 0.8    | 0.43   | 0.19   | 0.18  | 0.15 |        |        |        |          |       |        |
